# Supplementary material
Source: publisher site journal article supplement (https://www.dovepress.com/article/84854)
Supplement: Supplementary file 1 [file get_supplementary_file.php]

**Supplementary Table 1:** Overview of studies focusing on gene-metformin interaction in type 2 diabetes.

| Variant                                                                | Population   | Study group  | N    | Outcome                                                                                   | Major findings                                                                                                                                                                                                                                                      | PMID       | Author (publication year) |
|------------------------------------------------------------------------|--------------|--------------|------|-------------------------------------------------------------------------------------------|---------------------------------------------------------------------------------------------------------------------------------------------------------------------------------------------------------------------------------------------------------------------|------------|---------------------------|
| <b>OCT1</b>                                                            |              |              |      |                                                                                           |                                                                                                                                                                                                                                                                     |            |                           |
| rs12208357(C>T), rs72552763(GAT>del), rs34130495(G>A), rs34059508(G>A) | Caucasians   | Healthy      | 34   | PK (AUC, Cmax, CLrenal)                                                                   | No significant difference in steady state PK parameters between carriers of 0, 1 or 2 reduced function alleles.                                                                                                                                                     | 25939711   | Christensen et al (2015)  |
| rs12208357(C>T), rs72552763(GAT>del), rs34130495(G>A), rs34059508(G>A) | Caucasians   | T2D          | 103  | PK (CL/F)                                                                                 | None of the SNPs showed significant association with total clearance of metformin.                                                                                                                                                                                  | 23475568   | Duong et al (2013)        |
| rs12208357(C>T), rs72552763(GAT>del), rs34130495(G>A), rs34059508(G>A) | Caucasians   | Healthy male | 103  | PK (CLrenal)                                                                              | Carriers of 0, 1 and 2 reduced function variants showed increasing pattern of renal clearance (30.6, 33.1, 37.1 L/h, P = 0.04).                                                                                                                                     | 19536068   | Tzvetkov et al (2009)     |
| rs12208357(C>T), rs34130495(G>A), rs34059508(G>A), 420del              | Caucasians   | Healthy      | 20   | PK (Cmax, AUC, V/F)                                                                       | Individuals having one or more variants showed higher Cmax (P = 0.004), AUC (P = 0.01) and lower oral volume of distribution (P = 0.02).                                                                                                                            | 17609683   | Shu et al (2007)          |
| rs12208357(C>T), rs72552763(GAT>del), rs34130495(G>A), rs34059508(G>A) | Caucasians   | T2D          | 159  | PK (trough steady state concentration)                                                    | Increasing number of deletions were associated with significant trend to decrease in trough steady state concentration (none, one or two: 642, 542, 397 ng/ml; P = 0.001).                                                                                          | 21989078   | Christensen et al (2011)  |
| rs12208357(C>T), rs72552763(GAT>del), rs34130495(G>A), rs34059508(G>A) | Caucasians   | T2D          | 159  | Response (HbA1c reduction)                                                                | Individuals with zero, one and two reduced function alleles showed 0%, 0.2 % (0.2-0.6) and 1.1% (0.4-1.9) HbA1c reduction. P = 0.016,                                                                                                                               | 21989078   | Christensen et al (2011)  |
| rs12208357(C>T), rs72552763(GAT>del), rs34130495(G>A), rs34059508(G>A) | Multi-ethnic | T2D          | 171  | Response (HbA1c reduction)                                                                | None of these reduced function SNPs showed significant association with HbA1c reduction.                                                                                                                                                                            | PMC3006596 | Davis et al (2010)        |
| rs12208357 (C>T), 420del                                               | Caucasians   | T2D          | 1531 | Response (HbA1c reduction, achieving treatment target, the hazard of monotherapy failure) | No significant association between these loss of function variants and response.                                                                                                                                                                                    | 19336679   | Zhou et al (2009)         |
| rs12208357(C>T), rs72552763(GAT>del), rs34130495(G>A), rs34059508(G>A) | Caucasian    | PCOS women   | 150  | Response (Insulin, total cholesterol, triglycerides)                                      | Carriers of no reduced function allele showed significant reduction in total cholesterol (-14mg/dl, P = 0.002), and triglycerides (-17mg/dl, P = 0.008). Insulin AUC decreased in carriers of 0 or 1 reduced function OCT1 variant carriers but not in two or more. | 20660041   | Gambineri et al (2010)    |
| rs622342 A>C                                                           | Caucasians   | T2D          | 102  | Response (HbA1c reduction)                                                                | Each minor C allele was associated with 0.28% (0.09-0.47, P = 0.005) less HbA1c reduction.                                                                                                                                                                          | 19381165   | Becker et al (2009)       |
| rs622342 A>C                                                           | Caucasians   | T2D          | 148  | Response (HbA1c reduction)                                                                | The minor allele was not associated with HbA1c reduction.                                                                                                                                                                                                           | 22882994   | Tkac et al (2012)         |

|                                                                                                     |                             |           |      |                                     |                                                                                                                                                                  |          |                          |
|-----------------------------------------------------------------------------------------------------|-----------------------------|-----------|------|-------------------------------------|------------------------------------------------------------------------------------------------------------------------------------------------------------------|----------|--------------------------|
| -43T > G                                                                                            | Japanese                    | T2D       | 33   | Response (achieving target)         | The minor allele was more frequent in responders than non-responders (0.42 Vs 0.33, P < 0.05).                                                                   | 17111267 | Shikata et al (2007)     |
| rs628031 (Met408Val)                                                                                | Japanese                    | T2D       | 33   | Response (achieving target)         | The Met allele was more frequent in non-responders than responders (0.28 Vs 0.19, P < 0.05).                                                                     | 17111267 | Shikata et al (2007)     |
| rs683369 (G>C)                                                                                      | Multi-ethnic                | High risk | 990  | Response (diabetes incidence)       | The major allele showed protective effect (HR = 0.69, 0.53-0.89, P = 0.004).                                                                                     | 20682687 | Jablonski et al (2010)   |
| rs12208357(C>T),<br>rs72552763(GAT>del),<br>rs34130495(G>A),<br>rs34059508(G>A),<br>rs55918055(T>C) | Caucasians                  | T2D       | 2166 | Response (GI side effect)           | Carriers of two or more reduced function alleles showed 2.41 (1.48-3.93, P < 0.001) times higher odds of developing GI side effects than carriers of no or one.  | 25510240 | Dujic et al (2015)       |
| rs12208357(C>T),<br>rs34059508(G>A)                                                                 | Caucasian                   | T2D       | 246  | Response (GI side effect)           | The minor alleles of these variants showed no significant association with GI side effect.                                                                       | 22735389 | Tarasova et al (2012)    |
| rs628031 (A>G)                                                                                      | Caucasian                   | T2D       | 246  | Response (GI side effect)           | The A allele showed significant association with GI side effect (OR = 0.389, P = 0.012).                                                                         | 22735389 | Tarasova et al (2012)    |
| rs36056065<br>(G160560908delinsGTAAGTT<br>G)                                                        | Caucasian                   | T2D       | 246  | Response (GI side effect)           | 8bp insertion showed significant association with GI side effect (OR = 0.405, P = 0.002)                                                                         | 22735389 | Tarasova et al (2012)    |
| <b>OCT2</b>                                                                                         |                             |           |      |                                     |                                                                                                                                                                  |          |                          |
| OCT2_c.596C>T,<br>OCT2_c.602C>T,<br>OCT2_c.808G>T                                                   | <i>In vitro</i>             |           |      | PK (uptake)                         | Carriers of the variant alleles showed significant (596C>T, 602C>T, 808G>T: 68.6, 60.1, and 39.6%) decrease in clearance than carriers of the reference alleles. | 18401339 | Song et al (2008)        |
| OCT2 808G >T                                                                                        | <i>In vitro</i>             |           |      | PK (uptake)                         | The minor allele showed 1.5 times higher metformin uptake than the reference allele (P < 0.01).                                                                  | 19483665 | Chen et al (2009)        |
| OCT2_808G >T                                                                                        | Chinese                     | T2D       | 18   | PK (AUC, CLrenal, CLtubular)        | Heterozygous GT carriers had higher AUC, CLrenal and CLtubular than wild GG genotype (P < 0.05).                                                                 | 25573751 | Hou et al (2015)         |
| OCT2_808G >T                                                                                        | Chinese                     | Healthy   | 15   | PK (CLtubular)                      | The minor allele was associated with reduced renal tubular secretion (P = 0.037).                                                                                | 18551044 | Wang et al (2008)        |
| OCT2_808G >T                                                                                        | Caucasians                  | Healthy   | 50   | PK (CLrenal, CLtubular)             | The minor allele showed no effect on the PK of metformin.                                                                                                        | 23873119 | Christensen et al (2013) |
| OCT2_808G >T                                                                                        | Korean                      | Healthy   | 96   | PK (AUC, Cmax)                      | Homozygous GG carriers showed lower AUC (0.007) and lower Cmax than heterozygous GT (P = 0.012) carriers.                                                        | 23417334 | Yoon et al (2013)        |
| OCT2_808G >T                                                                                        | Caucasian,<br>Afro-American | Healthy   | 23   | PK (CLrenal, CLtubular)             | Subjects homozygous for the reference allele showed lower renal (0.005) and tubular clearance (0.002) than heterozygous subjects.                                | 19483665 | Chen et al (2009)        |
| OCT2_602C>T,<br>OCT2_c.596C>T                                                                       | Korean                      | Healthy   | 26   | PK (Cmax, CL/F, CLrenal, CLtubular) | Participants heterozygous for the minor allele of either of the variants showed higher Cmax and AUC & lower CL/F, CLrenal, CLtubular.                            | 18401339 | Song et al (2008)        |
| OCT2_808G >T                                                                                        | Chinese                     | T2D       | 209  | Response (HbA1c reduction)          | Heterozygous GT carriers showed greater HbA1c reduction than the wild type (-2.2 Vs -1.1, P < 0.05)                                                              | 25573751 | Hou et al (2015)         |
| OCT2_808G >T                                                                                        | Caucasian                   | T2D       | 148  | Response (HbA1c reduction)          | The minor allele showed no significant difference in HbA1c reduction.                                                                                            | 22882994 | Tkac et al (2012)        |
| OCT2_808G >T                                                                                        | Japanese                    | T2D       | 33   | Response (achieving target)         | No significant difference in prevalence of the minor allele between responders and non-responders.                                                               | 17111267 | Shikata et al (2007)     |
| OCT2_808G >T                                                                                        | Caucasian                   | T2D       | 246  | Response (GI side effect)           | The minor allele showed no significant association with GI side effect.                                                                                          | 22735389 | Tarasova et al (2012)    |

|                                                                                           |                      |              |     |                                                                           |                                                                                                                                               |          |                        |
|-------------------------------------------------------------------------------------------|----------------------|--------------|-----|---------------------------------------------------------------------------|-----------------------------------------------------------------------------------------------------------------------------------------------|----------|------------------------|
| OCT2_808G>T                                                                               | Chinese              | T2D          | 400 | Response (lactate concentration)                                          | Patients with the mutant genotype (TT) had higher incidence of hyperlactacidemia compared with the GG genotype (40% vs 6.9%, P = 0.05).       | 20139901 | Li et al (2010)        |
| OCT2_602C>T                                                                               | Japanese             | T2D          | 33  | Response (achieving target)                                               | No significant difference in prevalence of the minor allele between responders and non-responders.                                            | 17111267 | Shikata et al (2007)   |
| OCT2_602C>T                                                                               | Iranian              | T2D          | 40  | Response (Insulin resistance (HOMA-IR) and beta cell function (HOMA-BCF)) | The T allele was associated with significant increase in HOMA-IR (P = 0.019) but not HOMA-BCF than homozygous CC.                             | 25662675 | Kashi et al (2015)     |
| rs662301C>T                                                                               | Multi-ethnic         | High risk    | 990 | Response (diabetes incidence)                                             | Carriers of the major allele benefit from metformin's protective effect (P = 0.02).                                                           | 20682687 | Jablonski et al (2010) |
| <b>OCT3</b>                                                                               |                      |              |     |                                                                           |                                                                                                                                               |          |                        |
| T44M_131C>T                                                                               | <i>In vitro</i>      |              |     | PK (uptake)                                                               | The minor allele showed 60% more uptake of metformin than the reference genotype (P < 0.001).                                                 | 20859243 | Chen et al (2010)      |
| V423F_1267G>T                                                                             | <i>In vitro</i>      |              |     | PK (uptake)                                                               | The minor allele showed 50% less uptake of metformin than the reference genotype (P < 0.001).                                                 | 20859243 | Chen et al (2010)      |
| 400I_1199C>T                                                                              | <i>In vitro</i>      |              |     | PK (uptake)                                                               | The minor allele showed 80% less uptake of metformin than the reference genotype (P < 0.001).                                                 | 20859243 | Chen et al (2010)      |
| rs3120137 G>A, rs3123634 C>T, rs12194182 A>G, rs2292334 C>T, rs2504927 G>A, rs2457576 C>G | Caucasians           | Healthy male | 103 | PK (CLrenal)                                                              | None of the variants showed significant association with renal clearance.                                                                     | 19536068 | Tzvetkov et al (2009)  |
| rs2076828 C > G                                                                           | Asian, Afro-American | Healthy      | 57  | PK (AUC, CLrenal, CLtubular) Response (OGTT)                              | The minor allele showed no association with the PK of metformin but significantly smaller change in AUC than the wild type (P < 0.001)        | 25920679 | Chen et al (2015)      |
| OCT3 <sup>-/-</sup>                                                                       | Knockout mice        |              |     | PK                                                                        | Knockout mice showed significant reduction in apparent volume of distribution, Clearance and bioavailability (P < 0.001)                      | 25920679 | Chen et al (2015)      |
| L503F Leu>Phe                                                                             | Caucasians           | Healthy male | 103 | PK (CLrenal)                                                              | The variants showed no significant association with renal clearance                                                                           | 19536068 | Tzvetkov et al (2009)  |
| <b>MATE1-metformin</b>                                                                    |                      |              |     |                                                                           |                                                                                                                                               |          |                        |
| G64D and V480M                                                                            | <i>In vitro</i>      |              |     | PK (uptake)                                                               | These variants showed complete loss of function                                                                                               | 19172157 | Chen et al (2009)      |
| G64D, L125F, V338I, V480M, C497S                                                          | <i>In vitro</i>      |              |     | PK (uptake)                                                               | These variants showed reduced transport of metformin (P < 0.01) than the reference genotypes                                                  | 19172157 | Chen et al (2009)      |
| rs2289669G>A                                                                              | Chinese              | T2D          | 30  | PK (AUC, CLrenal, CLtubular)                                              | Homozygous A allele carriers showed higher AUC and lower clearance (P < 0.01) than the reference genotype.                                    | 26004431 | He et al (2015)        |
| rs2289669G>A                                                                              | Japanese             | T2D          | 48  | PK (oral clearance)                                                       | Heterozygosity for the minor allele showed no significant difference in oral clearance compared with homozygous GG                            | 20016398 | Toyama et al (2010)    |
| rs2252281T>C                                                                              | Asian, Afro-American | Healthy      | 57  | PK (Cmax, CLrenal), Response (Glucose AUC after OGTT)                     | No significant genotype-PK association was showed, Homozygous CC carriers had lower glucose AUC (greater response) than the reference allele. | 23267855 | Stocker et al (2013)   |
| rs2289669G>A                                                                              | Caucasians           | T2D          | 148 | Response (HbA1c reduction)                                                | Homozygous A allele carriers showed higher HbA1c reduction than carriers of the G allele (1.10 ± 0.18% Vs 0.55 ± 0.09%, P = 0.02)             | 22882994 | Tkac et al (2012)      |

|                        |                            |           |     |                                                            |                                                                                                                                                                                                                                                   |            |                        |
|------------------------|----------------------------|-----------|-----|------------------------------------------------------------|---------------------------------------------------------------------------------------------------------------------------------------------------------------------------------------------------------------------------------------------------|------------|------------------------|
| rs2289669G>A           | Multi-ethnic               | T2D       | 171 | Response (HbA1c reduction)                                 | Carriers of the minor allele (A) had 0.45% (0.17-0.74%) smaller absolute HbA1c reduction than homozygous GG carriers                                                                                                                              | PMC3006596 | Davis et al (2010)     |
| rs2289669G>A           | Caucasians                 | T2D       | 116 | Response (HbA1c reduction)                                 | Each minor allele was associated with 0.3% (-0.51 to -0.10, $P < 0.005$ ) more A1c reduction                                                                                                                                                      | 19228809   | Becker et al (2009)    |
| rs2289669G>A           | Chinese                    | T2D       | 220 | Response (HbA1c reduction)                                 | Homozygosity for the minor allele (-2.3%) showed significantly higher HbA1c reduction than GG (-1.16%) and GA (-1.07%) allele carriers ( $P < 0.05$ )                                                                                             | 26004431   | He et al (2015)        |
| rs2289669G>A           | Caucasians                 | T2D       | 246 | Response (GI side effect)                                  | The minor allele showed no significant association with GI side effect                                                                                                                                                                            | 22735389   | Tarasova et al (2012)  |
| rs2252281T>C           | Caucasians, Afro-Americans | T2D       | 249 | Response (HbA1c reduction)                                 | After removing OCT1 variant carriers, patients homozygous for the minor allele had significantly larger relative change in HbA1c levels (i.e. greater response to metformin) than patients carrying at least one reference allele ( $P = 0.01$ ). | 23267855   | Stocker et al (2013)   |
| rs8065082C>T           | Multi-ethnic               | High risk | 990 | Response (diabetes incidence)                              | The minor allele was associated with lower incidence of T2D after metformin treatment (HR = 0.78, 0.64-0.96, $P = 0.02$ )                                                                                                                         | 20682687   | Jablonski et al (2010) |
| <b>MATE2-metformin</b> |                            |           |     |                                                            |                                                                                                                                                                                                                                                   |            |                        |
| rs12943590G>A          | Multi-ethnic               | T2D       | 171 | Response (HbA1c reduction)                                 | Homozygous AA carriers had 0.43% lower HbA1c reduction (0.43%, 0.053-0.86%) than the reference genotype                                                                                                                                           | PMC3006596 | Davis et al (2010)     |
| rs12943590G>A          | Caucasian, Afro-American   | Healthy   | 57  | PK (CLrenal, CLtubular), Response (Glucose AUC after OGTT) | Carriers of one or more variant allele showed higher renal and tubular clearance than homozygous GG ( $P < 0.05$ ), Homozygosity for the reference allele was associated with higher glucose AUC ( $P < 0.05$ )                                   | 23267855   | Stocker et al (2013)   |
| c.485C>T, c.1177G>A    | <i>In vitro</i>            |           |     | PK (uptake)                                                | Both variants showed 3-5 times lower metformin uptake than the reference ( $P < 0.05$ ) allele                                                                                                                                                    | 21956618   | Choi et al (2011)      |
| rs12943590G>A          | Caucasian + Afro-American  | T2D       | 253 | Response (HbA1c reduction)                                 | Patients homozygous for the minor allele had smaller change in HbA1c than carriers of the reference allele ( $-0.027$ Vs $-0.15$ , $P = 0.002$ )                                                                                                  | 21956618   | Choi et al (2011)      |

AUC: area under the curve; CLrenal: renal clearance; CLtubular: renal clearance by secretion; CL/F: total clearance; Cmax: maximal plasma concentration; HbA1c: glycated haemoglobin; HOMA-BCF: homeostasis model assessment of beta cell function; HOMA-IR: homeostasis model assessment of insulin resistance; OGTT: oral glucose tolerance test; PCOS: polycystic ovary syndrome; PK: pharmacokinetics; T2D: type 2 diabetes mellitus; V/F: oral volume of distribution.

**Supplementary Table 2: Overview of studies focusing on gene-SU interaction in type 2 diabetes.**

| Gene        | Variant         | Population | Study group | Drug        | N    | Outcome                                 | Major findings                                                                                                                                                                          | PMID     | Author (publication year) |
|-------------|-----------------|------------|-------------|-------------|------|-----------------------------------------|-----------------------------------------------------------------------------------------------------------------------------------------------------------------------------------------|----------|---------------------------|
| <b>CYPs</b> |                 |            |             |             |      |                                         |                                                                                                                                                                                         |          |                           |
| CYP2C9      | CYP2C9*2 and *3 | Caucasians | T2D         | Tolbutamide | 475  | Response (prescribed dose)              | *3 genotype carriers were prescribed with lower dose of tolbutamide than the wild type carriers ( $P < 0.05$ ). *2 carriers showed no significant difference compared to the wild type. | 17597710 | Becker et al (2008)       |
| CYP2C9      | CYP2C9*2 and *3 | Caucasians | T2D         | SUs         | 1073 | Response (achieving target HbA1c, HbA1c | Patients with two copies of loss of function alleles were 3.4 ( $P = 0.0009$ ) times more likely to achieve target HbA1c than                                                           | 19794412 | Zhou et al (2010)         |

|                    |                        |              |              |                            |      |                                                                   |                                                                                                                                                                                                                    |          |                          |
|--------------------|------------------------|--------------|--------------|----------------------------|------|-------------------------------------------------------------------|--------------------------------------------------------------------------------------------------------------------------------------------------------------------------------------------------------------------|----------|--------------------------|
|                    |                        |              |              |                            |      | reduction, time to monotherapy failure)                           | wild type carriers or 0.5% greater HbA1c reduction, and low hazard of monotherapy failure.                                                                                                                         |          |                          |
| CYP2C9             | CYP2C9*3               | Japanese     | T2D          | Glimepiride                | 42/6 | Response (HbA1c reduction), PK (AUC)                              | CYP2C9*1/*3 genotype was associated with significantly greater HbA1c reduction (P < 0.05).                                                                                                                         | 16325295 | Suzuki et al (2006)      |
| CYP2C9             | CYP2C9*2 and *3        | Caucasians   | T2D          | SUs                        | 207  | Response (prescribed dose, time to stable dose)                   | No significant association but trend towards lower stable glimepiride dose was observed.                                                                                                                           | 21121772 | Swen et al (2010)        |
| CYP2C9             | CYP2C9*2 and *3        | Caucasians   | T2D          | SUs                        | 357  | Response (severe hypoglycaemia)                                   | *3/*3 and *2/*3 genotypes were more common in the hypoglycaemic group than the comparison group (10% Vs < 2%, P = 0.028).                                                                                          | 15963101 | Holstein et al (2005)    |
| CYP2C9             | CYP2C9*2 and *3        | Caucasians   | T2D          | Glimepiride and glyclazide | 176  | Response (incidence of hypoglycaemia)                             | Patients with *1/*3 genotype had 1.69 (P = 0.011) times higher risk of hypoglycaemia.                                                                                                                              | 19891554 | Ragia et al (2009)       |
| CYP2C9             | CYP2C9*2 and *3        | Turkish      | T2D          | SUs                        | 108  | Response (mild hypoglycaemia)                                     | CYP2C9*2 and *3 were more frequent in the hypoglycaemic group than non-hypoglycaemic group (7% Vs 3%, P < 0.05)                                                                                                    | 21691805 | Gokalp et al (2011)      |
| CYP2C9             | CYP2C9*2 and *3        | Caucasians   | T2D          | SUs                        | 203  | Response (hypoglycaemia and prescribed dose)                      | No over representation of loss of function alleles among hypoglycaemics were observed but slower metabolizers were prescribed with lower dose (P = 0.027).                                                         | 21213107 | Holstein et al (2011)    |
| CYP2C9             | CYP2C9*2 and *3        | South Indian | T2D          | Glibenclamide              | 80   | Response (HbA1c reduction, hypoglycaemia)                         | CYP2C9*1/*3 genotype showed no significant association with risk of hypoglycaemia, carriers of loss of function variants (*1/*3 and *1/*2) had better diabetic control than the wild type carriers (P < 0.001).    | 21336994 | Surendiran et al (2011)  |
| CYP2C9             | CYP2C9*2 and *3        | Caucasians   | T2D          | SUs                        | 156  | Response (incidence of hypoglycaemia, HbA1c reduction)            | No significant association between CYP2C9 genotype and risk of hypoglycaemia or HbA1c reduction was found.                                                                                                         | 24442125 | Klen et al (2014)        |
| CYP2C9             | CYP2C9*2               | Caucasians   | T2D          | SUs                        | 176  | Response (risk of hypoglycaemia)                                  | *2 genotype carriers that are POR*1/*1 were 3.2 (P=0.031) times more likely to encounter hypoglycaemia than the wild type carriers.                                                                                | 24464600 | Ragia et al (2014)       |
| CYP2C9             | CYP2C9*2 and *3        | Caucasians   | Healthy      | Glibenclamide              | 21   | Response (Insulin and glucose concentration), PK (oral clearance) | Carriers of *3/*3 genotype had lower oral clearance (P < 0.001) and increased insulin secretion (P = 0.028) than carriers of the wild type.                                                                        | 11956512 | Kirchheiner et al (2002) |
| CYP2C9             | CYP2C9*3               | Korean       | Healthy      | Tolbutamide                | 18   | PK (AUC, Cmax, t1/2)                                              | Carriers of *1/*3 genotype had greater AUC, Cmax, and longer t1/2 compared with the wild genotype carriers.                                                                                                        | 11875365 | Shon et al (2002)        |
| CYP2C9             | CYP2C9*3               | Chinese      | Healthy      | Glimepiride                | 19   | PK (AUC, Cmax, t1/2, oral clearance)                              | Carriers of *3 genotype showed significantly greater AUC and Cmax and longer t1/2 and reduced oral clearance than the wild type carriers.                                                                          | 16003298 | Wang et al (2005)        |
| CYP2C9             | CYP2C9*3               | Chinese      | Healthy male | Glibenclamide              | 18   | PK (AUC, t1/2)                                                    | CYP2C9*1/*3 carriers showed significantly greater AUC (P < 0.05) and longer t1/2 (P < 0.05) than the wild type irrespective of their CYP2C19 genotype.                                                             | 16198656 | Yin et al (2005)         |
| CYP2C9 and CYP2C19 | CYP2C9*3 and CYP2C19*3 | Chinese      | Healthy male | Gliclazide MR              | 24   | PK (AUC, t1/2)                                                    | Carriers of poor metabolizing CYP2C19 variants showed significantly higher AUC (P < 0.01) and prolonged t1/2 (P < 0.01) than the wild type. CYP2C9 variants showed no significant role in the PK of gliclazide MR. | 17298483 | Zhang et al (2007)       |
| KCNJ11/ABCC8       |                        |              |              |                            |      |                                                                   |                                                                                                                                                                                                                    |          |                          |

|               |                             |            |     |               |      |                                                        |                                                                                                                                                                                                                 |          |                              |
|---------------|-----------------------------|------------|-----|---------------|------|--------------------------------------------------------|-----------------------------------------------------------------------------------------------------------------------------------------------------------------------------------------------------------------|----------|------------------------------|
| ABCC8         | S1369A (rs757110 G>T)       | Caucasians | T2D | SUs           | 156  | Response (incidence of hypoglycaemia, HbA1c reduction) | No significant association between the variant allele and risk of hypoglycaemia or HbA1c reduction was found.                                                                                                   | 24442125 | Klen et al (2014)            |
| ABCC8         | S1369A (rs757110 G>T)       | Chinese    | T2D | Gliclazide    | 1268 | Response (FPG, 2 hour glucose, HbA1c)                  | Compared to the wild type carriers, carriers of A/A genotype showed 7.7% greater reduction in FPG (P <0.001), 11.9% greater reduction in 2 hour glucose (P = 0.003) and 3.5% greater reduction in HbA1c (0.06). | 18599530 | Feng et al (2008)            |
| ABCC8         | E23K (rs5219A>G)            | Caucasians | T2D | Glibenclamide | 525  | Response (risk of secondary failure)                   | Carriers of the K allele showed 1.69 (1.02-2.74, P = 0.04) times higher odds of secondary failure than homozygotes EE carriers.                                                                                 | 16595597 | Sesti et al (2006)           |
| ABCC8         | S1369A (rs757110 G>T)       | Japanese   | T2D | Glibenclamide | 157  | Response (incidence of severe hypoglycaemia)           | No significant difference in distribution of the genotype between cases and controls.                                                                                                                           | 21142918 | Sato et al (2010)            |
| KCNJ11        | E23K (rs5219A>G), rs5215G>A | Caucasians | T2D | SUs           | 156  | Response (incidence of hypoglycaemia, HbA1c reduction) | No significant association between KCNJ11 variants and risk of hypoglycaemia or HbA1c reduction was found.                                                                                                      | 24442125 | Klen et al (2014)            |
| KCNJ11        | E23K (rs5219A>G)            | Caucasians | T2D | SUs           | 101  | Response (HbA1c reduction)                             | Carriers of the K allele had greater HbA1c (P = 0.04) reduction than EE homozygotes.                                                                                                                            | 22385882 | Javorski et al (2012)        |
| KCNJ11        | E23K (rs5219A>G)            | Caucasians | T2D | SUs           | 364  | Response (FPG)                                         | The minor allele showed no association with response to SUs.                                                                                                                                                    | 11318841 | Gloyn et al (2000)           |
| KCNJ11        | E23K (rs5219A>G)            | Caucasians | T2D | SUs           | 176  | Response (incidence of mild hypoglycaemia)             | No difference in frequency of the variant were observed between cases and controls.                                                                                                                             | 22591706 | Ragia et al (2012)           |
| KCNJ11        | E23K (rs5219A>G)            | Caucasians | T2D | SUs           | 97   | Response (incidence of severe hypoglycaemia)           | The K allele was associated with higher HbA1c (P = 0.04) and less frequent in hypoglycaemic groups (P = 0.04).                                                                                                  | 19214942 | Holstein et al (2009)        |
| KCNJ11        | E23K (rs5219A>G)            | Chinese    | T2D | Gliclazide MR | 108  | Response (FPG, acute insulin response)                 | KK genotype carriers showed lower FPG (P = 0.03) and greater change in insulin (P = 0.05) than E allele carriers.                                                                                               | 25115353 | Li et al (2014)              |
| <b>TCF7L2</b> |                             |            |     |               |      |                                                        |                                                                                                                                                                                                                 |          |                              |
| TCF7L2        | rs12255372 G>T              | Caucasians | T2D | SUs           | 901  | Response (treatment failure)                           | Homozygous TT genotype was associated with 1.94 (1.23-3.06) times higher odds of treatment failure than GG genotype (P = 0.005).                                                                                | 17519421 | Pearson et al (2007)         |
| TCF7L2        | rs7903146 C>T               | Caucasians | T2D | Gliclazide    | 101  | Response (HbA1c reduction)                             | Homozygous C allele carriers showed 80% higher HbA1c reduction than the T allele carriers.                                                                                                                      | 23509454 | Javorski et al (2013)        |
| TCF7L2        | rs7903146 C>T               | Caucasians | T2D | SUs           | 901  | Response (treatment failure)                           | Homozygous TT genotype was associated with 1.73 (1.11–2.70) times higher odds of treatment failure than GG genotype (P = 0.015).                                                                                | 17519421 | Pearson et al (2007)         |
| TCF7L2        | rs7903146 C>T               | Caucasians | T2D | SUs           | 87   | Response (FPG, HbA1c reduction)                        | Homozygous carriers of the reference allele showed significant reduction in HbA1c (P = 0.003) and FPG (P = 0.031) than carriers of the minor allele.                                                            | 21114608 | Schroner et al (2011)        |
| TCF7L2        | rs7903146 C>T               | Caucasians | T2D | SUs           | 189  | Response (secondary treatment failure)                 | Patients who failed to respond to SU treatment showed 1.57 (1.01-2.45) times higher odds of carrying the T allele (P = 0.046).                                                                                  | 21349175 | Holstein et al (2011)        |
| <b>Others</b> |                             |            |     |               |      |                                                        |                                                                                                                                                                                                                 |          |                              |
| ABCA1         | R230C                       | Mexican    | T2D | Glyburide     | 85   | Response (dose to achieve target HbA1c)                | Carriers of the variant allele needed significantly higher dose to achieve target than the wild type (6.3 Vs 3.3mg/day, P < 0.001).                                                                             | 23273975 | Aguilar-Salinas et al (2013) |

|        |               |            |     |     |     |                                           |                                                                                                                                                                             |          |                       |
|--------|---------------|------------|-----|-----|-----|-------------------------------------------|-----------------------------------------------------------------------------------------------------------------------------------------------------------------------------|----------|-----------------------|
| CDKAL1 | rs7756992A>G  | Caucasians | T2D | SUs | 101 | Response (FPG, HbA1c reduction)           | Carriers of the G allele had significantly greater FPG (P = 0.022) reduction than homozygous AA. However no significant difference in HbA1c between genotypes was observed. | 22292718 | Schröner et al (2012) |
| IRS1   | rs1801278G>A  | Caucasians | T2D | SUs | 477 | Response (secondary SU treatment failure) | Patients with the variant allele had 2 (1.38-3.86, P = 0.038) times higher odds of secondary failure than the wild type carriers.                                           | 15161794 | Sesti et al (2004)    |
| KCNQ1  | rs163184T>G   |            | T2D | SUs | 87  | Response (FPG reduction)                  | Carriers of the T allele had significantly greater FPG (1.58 Vs 1.04 mmol/L, P = 0.016) reduction than homozygous GG carriers.                                              | 21709633 | Schröner et al (2011) |
| NOS1AP | rs10494366G>T | Caucasians | T2D | SUs | 619 | Response (prescribed dose)                | Glibenclamide users with TG genotype were prescribed with higher dose than GG (0.38 ddd, 0.14-0.63)                                                                         | 18551039 | Becker et al (2008)   |

AUC: area under the curve; Cmax: maximal plasma concentration; ddd: defined daily dose; FPG: fasting plasma glucose; HbA1c: glycated haemoglobin; MR: modified release; PK: pharmacokinetics; SUs: sulfonylureas; T2D: type 2 diabetes; t1/2: elimination half-life.

**Supplementary Table 3:** Overview of studies focusing on gene-glinides interaction in type 2 diabetes.

| Gene    | Variant          | Population | Study group  | Drug        | N   | Outcome                                              | Major findings                                                                                                                                                              | PMID     | Author (publication year) |
|---------|------------------|------------|--------------|-------------|-----|------------------------------------------------------|-----------------------------------------------------------------------------------------------------------------------------------------------------------------------------|----------|---------------------------|
| SLCO1B1 | 521T>C           | Caucasians | Healthy      | Repaglinide | 56  | PK (AUC, Cmax)                                       | Homozygous CC carriers showed higher AUC and Cmax than T allele carriers (P < 0.0001)                                                                                       | 15961978 | Niemi et al (2005)        |
| SLCO1B1 | 521T>C           | Caucasians | Healthy      | Repaglinide | 32  | PK (AUC)                                             | Participants with CC genotype showed 59 (P = 0.001) and 72% (P < 0.001) greater AUC than TC and TT carriers respectively.                                                   | 18187595 | Kalliokoski et al (2008)  |
| SLCO1B1 | 11187G>A         | Caucasians | Healthy      | Repaglinide | 56  | Response (glucose)                                   | Carriers of the minor allele showed 11% (P = 0.01) and 6.6% (0.056) maximum decrease in blood glucose and mean glucose change respectively, than carriers of the wild type. | 15961978 | Niemi et al (2005)        |
| SLCO1B1 | *1B              |            | Healthy      | Repaglinide | 24  | PK (AUC, Cmax)                                       | SLCO1B1*1B/*1B carriers showed 32 and 24% of AUC (P = 0.007) and Cmax (P = 0.056) of SLCO1*1A/*1A carriers                                                                  | 18854776 | Kalliokoski et al (2008)  |
| SLCO1B1 | *1B              | Chinese    | Healthy male | Repaglinide | 22  | PK (AUC, clearance)                                  | Carriers of *1A/*1B or *1A/*1A showed 27.39% higher AUC than *1B/*1B (P = 0.015).                                                                                           | 21327909 | He et al (2011)           |
| KCNJ11  | E23K (rs5219A>G) | Chinese    | T2D          | Repaglinide | 100 | Response (plasma glucose reduction, HbA1c reduction) | the K allele was associated with greater reduction in HbA1c (P = 0.02) and the E/K genotype showed greater 2hr glucose reduction (P = 0.04) than homozygous E/E.            | 18664331 | He et al (2008)           |
| SLC30A8 | rs13266634C>T    | Chinese    | T2D          | Repaglinide | 48  | Response (insulin)                                   | Patients with the T allele showed greater increase in fasting (P<0.05) and post prandial (P<0.01) insulin than homozygous CC carriers.                                      | 20809084 | Huang et al (2010)        |
| SLC30A8 | rs13266634C>T    | Chinese    | T2D          | Repaglinide | 104 | Response (HOMA-BCF, fasting pro insulin level)       | No significant difference in insulin secretion parameters between genotypes was observed.                                                                                   | 22424623 | Feng et al (2012)         |
| SLC30A8 | rs16889462G>A    | Chinese    | T2D          | Repaglinide | 48  | Response (insulin, HbA1c)                            | Patients heterozygous GA showed greater increase in fasting insulin (P<0.01), post prandial insulin (P<0.01) and HbA1c (P<0.05) reduction than homozygous GG individuals.   | 20809084 | Huang et al (2010)        |

|         |                         |            |         |             |     |                                                    |                                                                                                                                                                                 |          |                         |
|---------|-------------------------|------------|---------|-------------|-----|----------------------------------------------------|---------------------------------------------------------------------------------------------------------------------------------------------------------------------------------|----------|-------------------------|
| KCNJ11  | E23K<br>(rs5219A>G)     | Chinese    | T2D     | Repaglinide | 40  | Response (FPG, 2 hour glucose and HbA1c reduction) | Patients with the A allele showed higher FPG, 2 hour glucose and HbA1c (P < 0.05) than GG homozygotes.                                                                          | 20054294 | Yu et al (2009)         |
| ABCC8   | rs1799854(ex on16-3T/C) | Chinese    | T2D     | Repaglinide | 100 | Response (fasting insulin)                         | Homozygous CC carriers showed greater change in fasting insulin than T/C (P = 0.04) and T/T (0.03) carriers.                                                                    | 18664331 | He et al (2008)         |
| CYP2C8  | *3                      | Caucasians | Healthy | Repaglinide | 28  | Response (plasma glucose change), PK (AUC, Cmax)   | No significant difference was found between genotypes. *1/*3 carriers showed 45% (P < 0.005) and 39% (P < 0.05) lower AUC and Cmax respectively than homozygous *1/*1 carriers. | 14534525 | Niemi et al (2003)      |
| CYP2C8  | *3                      | Caucasians | Healthy | Repaglinide | 56  | PK (AUC, Cmax)                                     | Carriers of *1/*3 genotype showed 48 and 44% lower AUC and Cmax respectively than *1/*1 (P < 0.05)                                                                              | 15961978 | Niemi et al (2005)      |
| CYP2C8  | *3                      | Caucasians | Healthy | Repaglinide | 29  | Response (glucose, insulin), PK (AUC)              | No significant differences in PK and response parameters between genotypes were showed.                                                                                         | 21270106 | Tomalik-Scharte (2011)  |
| CYP3A4  | *18                     | Malaysian  | Healthy | Repaglinide | 121 | PK (elimination constant, t1/2)                    | CYP3A4*1/*18 carriers had 44 (P = 0.04) and 33.8% (P = 0.04) lower elimination rate constant and half-life respectively, than the wild genotype carriers.                       | 20523106 | Ruzilawati et al (2009) |
| IGF2BP2 | rs1470579A>C            | Chinese    | T2D     | Repaglinide | 42  | Response (FPG, PPG)                                | Compared with homozygous AA, carriers of the minor allele showed significantly less FPG (P < 0.05) and PPG (P < 0.05) reduction.                                                | 20523342 | Huang et al (2010)      |
| IGF2BP2 | rs4402960               | Chinese    | T2D     | Repaglinide | 42  | Response (insulin)                                 | Carriers of the T allele had enhanced insulin concentration than homozygous GG carriers (P < 0.01)                                                                              | 20523342 | Huang et al (2010)      |
| KCNQ1   | rs2237892C>T            | Chinese    | T2D     | Repaglinide | 91  | Response (PPG)                                     | Carriers of the TT genotype showed lower PPG and higher cumulative attainment of target PPG (P = 0.038) than C allele carriers.                                                 | 21289621 | Yu et al (2011)         |
| KCNQ1   | rs2237895A>C            | Chinese    | T2D     | Repaglinide | 91  | Response (fasting insulin, HOMA-IR)                | Carriers of the minor allele showed greater increment in both fasting insulin and HOMA-IR.                                                                                      | 21289621 | Yu et al (2011)         |
| KCNQ1   | rs2237892C>T            | Chinese    | T2D     | Repaglinide | 40  | Response (PPG)                                     | Carriers of the T allele showed greater reduction in PPG than homozygous CC carriers (P < 0.05).                                                                                | 22414228 | Dai et al (2012)        |
| KCNQ1   | rs2237895A>C            | Chinese    | T2D     | Repaglinide | 40  | Response (PPG)                                     | Carriers of the C allele showed greater reduction in PPG than homozygous AA carriers (P < 0.05).                                                                                | 22414228 | Dai et al (2012)        |
| NOS1AP  | rs10494366G>T           | Chinese    | T2D     | Repaglinide | 100 | Response (HOMA-IR)                                 | TT carriers had the least insulin resistance on HOMA-IR (P = 0.013)                                                                                                             | 20305679 | Qin et al (2010)        |
| NOS1AP  | rs12742393A>C           | Chinese    | T2D     | Repaglinide | 84  | Response (FPG, fasting insulin, HOMA-IR)           | Patients with the minor C allele had reduced fasting glucose (P < 0.01), insulin (P < 0.05) and HOMA-IR (P < 0.001) than carriers of AA genotype.                               | 24338736 | Wang et al (2014)       |
| PAX4    | R121W                   | Chinese    | T2D     | Repaglinide | 43  | Response (FPG, PPG)                                | Patients homozygous for the reference allele showed better efficacy in terms of PPG than heterozygous RW carriers (P < 0.05).                                                   | 22296034 | Gong et al (2012)       |
| PPARD   | rs2016520T>C            | Chinese    | T2D     | Repaglinide | 84  | Response (insulin)                                 | Heterozygous TC carriers showed significantly lower increase in post prandial insulin than the wild type carriers (P < 0.05).                                                   | 25311380 | Song et al (2015)       |
| MDR1    | G2677T>A                | Chinese    | T2D     | Repaglinide | 24  | PK (AUC)                                           | Subjects with GT and TT genotype showed significantly greater AUC than GG and TA carriers (P = 0.007).                                                                          | 22398664 | Xiang et al (2012)      |
| NAMPT   | 3186C>T                 | Chinese    | T2D     | Repaglinide | 35  | Response (insulin)                                 | Patients heterozygous CT showed significantly lower insulin elevation than homozygous CC or TT patients (P < 0.05)                                                              | 21631570 | Sheng et al (2011)      |



|                                |                      |            |         |             |    |                                                  |                                                                                                                                                                                                                                                                                                                                                    |          |                          |
|--------------------------------|----------------------|------------|---------|-------------|----|--------------------------------------------------|----------------------------------------------------------------------------------------------------------------------------------------------------------------------------------------------------------------------------------------------------------------------------------------------------------------------------------------------------|----------|--------------------------|
| TCF7L2                         | rs290487C/T          | Chinese    | T2D     | Repaglinide | 40 | Response (fasting insulin, triglycerides)        | Homozygous TT carriers showed better efficacy in terms of fasting insulin and triglyceride levels.                                                                                                                                                                                                                                                 | 20054294 | Yu et al (2010)          |
| UCP2                           | 866G>A               | Chinese    | T2D     | Repaglinide | 41 | Response (FPG, HbA1c)                            | Carriers of the A allele showed smaller decrease in FPG ( $P < 0.05$ ), HbA1c ( $P < 0.05$ ) and smaller increase in 30 min post load plasma insulin ( $P < 0.01$ ) compared with GA carriers.                                                                                                                                                     | 22393835 | Wang et al (2012)        |
| CYP2C9                         | CYP2C9*3             | Caucasians | Healthy | Nateglinide | 26 | PK (CL/F), Response (Glucose, insulin, glucagon) | CYP2C9*3 carriers showed significantly reduced oral clearance than the wild type carriers ( $P < 0.01$ ) but no difference in glycaemic response was observed.                                                                                                                                                                                     | 15005635 | Kirchheiner et al (2004) |
| SLCO1B1                        | *1B/*1B              |            | Healthy | Nateglinide | 24 | PK (AUC, Cmax), Response (glucose)               | Cmax occurred earlier in *1B/*1B than *1A/*1A carriers but no significant difference in other PK parameters or PD.                                                                                                                                                                                                                                 | 18854776 | Kalliokoski et al (2008) |
| SLCO1B1                        | c.521T>C             | Chinese    | Healthy | Nateglinide | 17 | PK (AUC, Cmax, t1/2)                             | Carriers of the C allele showed significantly higher Cmax ( $P = 0.002$ ) and AUC ( $P = 0.001$ ) than homozygous TT carriers. Homozygous CC subjects also showed longer t1/2 than TT subjects ( $P = 0.036$ ).                                                                                                                                    | 16796707 | Zhang et al (2006)       |
| CYP2C9 and SLCO1B1 interaction | CYP2C9*3 / c.521 T>C | Chinese    | Healthy | Nateglinide | 35 | PK (AUC), response (glucose)                     | Participants with *1/*3 & 521TT (56% higher, $P < 0.001$ ), *1/*1 & 521TC/CC (34% higher, $P = 0.003$ ) and *1/*3 & 521TC (56% higher, $P = 0.002$ ) AUC, than reference carriers for both genotypes. They also showed significantly lower clearance than the reference. No significant difference in blood glucose between genotypes were showed. | 22842957 | Cheng et al (2012)       |

AUC: area under the curve; CL/F: total clearance; Cmax: maximal plasma concentration; FPG: fasting plasma glucose; HbA1c: glycated haemoglobin; HOMA-BCF: homeostasis model assessment of beta cell function; HOMA-IR: homeostasis model assessment of insulin resistance; PK: pharmacokinetics; PD: pharmacodynamics; PPG: post prandial glucose; T2D: type 2 diabetes; t1/2: elimination half-life.

**Supplementary Table 4:** Overview of studies focusing on gene-thiazolidinediones interaction in type 2 diabetes.

| Gene   | Variant            | Population | Study group | Drug          | N   | Outcome                               | Major findings                                                                                                                                                                                                                                                            | PMID     | Author (publication year) |
|--------|--------------------|------------|-------------|---------------|-----|---------------------------------------|---------------------------------------------------------------------------------------------------------------------------------------------------------------------------------------------------------------------------------------------------------------------------|----------|---------------------------|
| ABCA1  | R219K              | Chinese    | T2D         | Rosiglitazone | 93  | Response (treatment failure, HOMA-IR) | R219K variant carriers showed greater treatment failure with per allele odds ratio of 2.04 ( $P < 0.05$ ) than homozygous carriers of the variant allele. Homozygous RR carriers had significantly greater decrease in HOMA-IR ( $P < 0.05$ ) than minor allele carriers. | 18215356 | Wang et al (2008)         |
| ABCA1  | M883I              | Chinese    | T2D         | Rosiglitazone | 93  | Response (treatment failure, HOMA-IR) | No significant difference in response parameters between genotypes.                                                                                                                                                                                                       | 18215356 | Wang et al (2008)         |
| ABCA1  | R1587K             | Chinese    | T2D         | Rosiglitazone | 93  | Response (treatment failure, HOMA-IR) | No significant difference in response parameters between genotypes.                                                                                                                                                                                                       | 18215356 | Wang et al (2008)         |
| ADIPOQ | 45T>G (rs2241766)  | Japanese   | T2D         | Rosiglitazone | 166 | Response (FPG, HbA1c reduction)       | GG carriers showed less reduction in both FPG ( $P = 0.031$ ) and HbA1c ( $P = 0.013$ ) than other genotype carriers.                                                                                                                                                     | 15855579 | Kang et al (2005)         |
| ADIPOQ | 276G>T (rs1501299) | Japanese   | T2D         | Rosiglitazone | 166 | Response (FPG, HbA1c reduction)       | GG carriers showed less reduction in FPG ( $P = 0.001$ ) than other genotype carriers but no significant difference in HbA1c.                                                                                                                                             | 15855579 | Kang et al (2005)         |

|         |                             |            |         |               |     |                                                                                  |                                                                                                                                                                                                                                                                        |          |                          |
|---------|-----------------------------|------------|---------|---------------|-----|----------------------------------------------------------------------------------|------------------------------------------------------------------------------------------------------------------------------------------------------------------------------------------------------------------------------------------------------------------------|----------|--------------------------|
| ADRB3   | Trp64Arg                    | Chinese    | T2D     | Rosiglitazone | 36  | Response (FPG, PPG, HbA1c, fasting and post prandial insulin)                    | No significant difference in response parameters between carriers of the minor allele and the wild type carriers.                                                                                                                                                      | 19659999 | Yang et al (2009)        |
| CYP2C8  | *3                          | Caucasians | Healthy | Rosiglitazone | 31  | PK (total clearance, t1/2), Response (glucose)                                   | Subjects having *1/*1, *1/*3, *3/*3 showed 0.033, 0.038, 0.046 L/h (P = 0.02) total clearance and 4.3, 3.5, 2.9 hours elimination half-lives. No significant difference in blood glucose levels between genotypes were found.                                          | 17178266 | Kirchheiner et al (2006) |
| CYP2C8  | *3                          | Caucasians | Healthy | Rosiglitazone | 23  | PK (AUC)                                                                         | No significant difference in PK parameters between genotypes.                                                                                                                                                                                                          | 16856883 | Pederson et al (2006)    |
| CYP2C8  | *3                          | Caucasians | Healthy | Rosiglitazone | 26  | PK (AUC, Cmax, CL/F)                                                             | *1/*3 carriers showed significantly lower AUC (P = 0.006), Cmax (p = 0.02) and higher clearance (0.03) than the wild type carriers.                                                                                                                                    | 19129086 | Aquilante et al (2008)   |
| CYP2C8  | *11                         | Korean     | Healthy | Rosiglitazone | 14  | PK (AUC, Cmax)                                                                   | Subjects carrying *1/*11 had 54 and 34% higher AUC (P = 0.015) and Cmax (P = 0.025), respectively than *1/*1 genotype.                                                                                                                                                 | 21245287 | Yeo et al (2011)         |
| KCNQ1   | rs2237897 C>T               | Chinese    | T2D     | Rosiglitazone | 93  | Response (FPG, PPG, HbA1c reduction)                                             | Carriers of the minor allele showed significantly greater reduction in PPG (P = 0.032) than the wild type carriers.                                                                                                                                                    | 21289621 | Yu et al (2010)          |
| LEPTIN  | G-2548A                     | Chinese    | T2D     | Rosiglitazone | 42  | Response (FPG, PPG, HbA1c reduction, HOMA-IR, fasting and post prandial insulin) | Homozygous AA carriers showed significantly enhanced fasting and postprandial insulin (P < 0.05) than the G allele carriers.                                                                                                                                           | 18438653 | Liu et al (2008)         |
| LPIN1   | rs10192566 C>G              | Korean     | T2D     | Rosiglitazone | 262 | Response (FPG, PPG, HbA1c reduction)                                             | Carriers of the G allele showed greater reduction in FPG (P = 0.005), PPG (P = 0.005) and HbA1c (0.014) compared to carriers of the wild type.                                                                                                                         | 18693052 | Kang et al (2008)        |
| PAX4    | rs6467136A>G                | Chinese    | T2D     | Rosiglitazone | 105 | Response (FPG, 2HG, HbA1c reduction)                                             | GA and AA carriers exhibited greater decrease in 2HG (P = 0.006) and higher target attainment rate of 2HG (P = 0.009) than the wild type carriers.                                                                                                                     | 24752311 | Chen et al (2014)        |
| PLIN    | 11482G>A                    | Korean     | T2D     | Rosiglitazone | 160 | Response (weight gain)                                                           | Carriers of AA, GA and GG genotypes had 0.03 ± 1.46, 0.85 ± 1.89 and 1.33 ± 1.59 KG weight gain respectively (P = 0.01).                                                                                                                                               | 16732015 | Kang et al (2006)        |
| PLIN    | 6209T>C, 13041A>G, 14995A>T | Korean     | T2D     | Rosiglitazone | 160 | Response (weight gain)                                                           | No significant difference in weight gain between genotypes.                                                                                                                                                                                                            | 16732015 | Kang et al (2006)        |
| PGC-1α  | Thr394Thr                   | Chinese    | T2D     | Rosiglitazone | 41  | Response (glucose, insulin, HbA1c reduction, HOMA-IR)                            | Patients with the A allele had less enhanced post prandial insulin than homozygous GG carriers (7.02 ± 11.8 Vs 15.37 ± 11.39, P = 0.027).                                                                                                                              | 20498286 | Zhang et al (2010)       |
| PGC-1α  | Gly482Ser                   | Chinese    | T2D     | Rosiglitazone | 41  | Response (glucose, insulin, HbA1c reduction, HOMA-IR)                            | Carriers of the Ser allele had significantly higher FPG, PPG and HOMA-IR (all P values < 0.05). Patients with the Ser allele also showed less attenuated fasting glucose and insulin levels (P < 0.05).                                                                | 20498286 | Zhang et al (2010)       |
| PPARγ2  | Pro12ala                    | Korean     | T2D     | Rosiglitazone | 198 | Response (response, FPG, HbA1c, Glucose, HbA1c)                                  | Carriers of the Ala allele showed significantly greater reduction in FPG (50.6 ± 27.8 mg/dL Vs 24.3 ± 41.9 mg/dL, P = 0.26), HbA1c (1.41% ± 1.47% Vs 0.57% ± 1.16%, P = 0.015) than the wild type. They also showed better response rate (86.67% Vs 43.72%, P = 0.002) | 16084854 | Kang et al (2005)        |
| SLCO1B1 | 521 T > C                   | Caucasians | Healthy | Rosiglitazone | 26  | PK (AUC, Cmax, CL/F)                                                             | No significant difference in the PK between genotypes were found.                                                                                                                                                                                                      | 19129086 | Aquilante et al (2008)   |

|               |               |            |                             |               |     |                                                                                                    |                                                                                                                                                                                                                  |          |                              |
|---------------|---------------|------------|-----------------------------|---------------|-----|----------------------------------------------------------------------------------------------------|------------------------------------------------------------------------------------------------------------------------------------------------------------------------------------------------------------------|----------|------------------------------|
| SLCO1B1       | 521 T > C     | Caucasians | Healthy                     | Rosiglitazone | 32  | PK (AUC)                                                                                           | No significant difference in the PK between genotypes were found.                                                                                                                                                | 17635496 | Kalliokoski et al (2008)     |
| TNF- $\alpha$ | G-308A        | Chinese    | T2D                         | Rosiglitazone | 42  | Response (FPG, PPG, HbA1c reduction, HOMA-IR, fasting and post prandial insulin)                   | Carriers of the minor allele showed significantly greater attenuated fasting insulin levels ( $P < 0.05$ ) than the wild type.                                                                                   | 18438653 | Liu et al (2008)             |
| UCP2          | 866 G>A       | Chinese    | T2D                         | Rosiglitazone | 36  | Response (FPG, PPG, HbA1c, fasting and post prandial insulin)                                      | Carriers of the variant allele showed smaller attenuated post prandial insulin ( $P < 0.01$ ) and greater attenuated HbA1c ( $P < 0.05$ ) than wild type carriers.                                               | 19659999 | Yang et al (2009)            |
| ADIPOQ        | G-10068A      | Chinese    | T2D                         | Pioglitazone  | 113 | Response (HbA1c, FPG)                                                                              | No significant difference in response between genotypes was showed.                                                                                                                                              | 18494805 | Li et al (2008)              |
| ADIPOQ        | C-11377G      | Chinese    | T2D                         | Pioglitazone  | 113 | Response (HbA1c, FPG)                                                                              | G allele carriers showed significant percentage reduction in HbA1c than CC homozygotes ( $-0.13 \pm 0.13$ Vs $-0.08 \pm 0.11$ , $P = 0.028$ ).                                                                   | 18494805 | Li et al (2008)              |
| ADIPOQ        | 45T>G         | Iranian    | T2D                         | Pioglitazone  | 101 | Response (15% decrease in HbA1c)                                                                   | No significant difference in response between genotypes.                                                                                                                                                         | 22187345 | Namvaran et al (2012)        |
| ADIPOR2       | 795G/A        | Iranian    | T2D                         | Pioglitazone  | 101 | Response (15% decrease in HbA1c)                                                                   | No significant difference in response between genotypes.                                                                                                                                                         | 22187345 | Namvaran et al (2012)        |
| CYP2C8        | *3            | Caucasians | Healthy                     | Pioglitazone  | 30  | PK (AUC)                                                                                           | *3 carriers showed 29.7% lower AUC ( $P = 0.01$ ) compared to homozygous *1/*1 carriers.                                                                                                                         | 22625877 | Aquilante et al (2012)       |
| CYP2C8        | *3            | Caucasians | Healthy                     | Pioglitazone  | 16  | PK (AUC)                                                                                           | *3/*3 and *1/*3 carriers showed 34% and 26% lower weight-adjusted AUC than the wild type ( $P < 0.05$ ).                                                                                                         | 17913794 | Torino et al (2008)          |
| LPL           | S447X         | Chinese    | T2D                         | Pioglitazone  | 113 | Response (>10% FPG reduction or >1% reduction in HbA1c)                                            | SS carriers had twice more odds of being a responder than carriers of the minor allele ( $P < 0.05$ ).                                                                                                           | 17394430 | Wang et al (2007)            |
| PGC-1         | Gly482Ser     | Chinese    | T2D                         | Pioglitazone  | 250 | Response (FPG, HbA1c)                                                                              | No significant difference in response between carriers of the variants were found.                                                                                                                               | 20045142 | Hsieh et al (2009)           |
| PPAR $\gamma$ | Pro12Ala      | Chinese    | T2D                         | Pioglitazone  | 250 | Response (FPG, HbA1c)                                                                              | Carriers of the minor allele (Ala) showed 2.316 (1.100-4.874, $P = 0.027$ ) times higher odds of being a responder than the wild type carriers.                                                                  | 20045142 | Hsieh et al (2009)           |
| PPAR $\gamma$ | Pro12Ala      | Chinese    | T2D                         | Pioglitazone  | 67  | Response (FPG, PPG, HbA1c)                                                                         | CG carriers showed higher differential values of FPG than CC carriers ( $-2.24 \pm 0.82$ Vs $-1.23 \pm 1.24$ , $P < 0.05$ ).                                                                                     | 23147557 | Pei et al (2013)             |
| PPAR $\gamma$ | Pro12Ala      | Iranian    | T2D                         | Pioglitazone  | 101 | Response (> 15% HbA1c reduction)                                                                   | No significant association between genotypes and response were found.                                                                                                                                            | 21968139 | Namvaran et al (2011)        |
| PPAR $\gamma$ | Pro12Ala      |            | Obese post-menopausal women | Pioglitazone  | 83  | (FPG, HOMA-IR, insulin)                                                                            | Pro/Ala carriers showed significant reduction in FPG than the wild type carriers ( $-15$ mg/dL Vs $-7$ mg/dL, $P < 0.003$ ). However insulin and HOMA-IR were lower in carriers of the wild type ( $P < 0.05$ ). | 18551086 | Ramirez-Salazar et al (2008) |
| PTPRD         | rs17584499T>C | Chinese    | T2D                         | Pioglitazone  | 67  | Response (FPG, PPG, HbA1c)                                                                         | Carriers of the reference allele showed significantly lower differential values of PPG than homozygous CC carriers ( $-0.63 \pm 3.26$ Vs $-3.18 \pm 3.37$ , $P < 0.01$ ).                                        | 23147557 | Pei et al (2013)             |
| RESISTIN      | 420C>G        | Japanese   | T2D                         | Pioglitazone  | 184 | Response (HbA1c ( $\beta = -0.511$ , $P = 0.044$ ) reduction, FPG ( $P = 0.02$ ), HOMA-IR (0.012)) | Homozygous GG carriers showed significant reduction in HbA1c, FPG and HOMA-IR than the wild type carriers.                                                                                                       | 19738363 | Makino et al (2009)          |

|         |              |            |         |              |    |                       |                                                                                                                                                                |          |                          |
|---------|--------------|------------|---------|--------------|----|-----------------------|----------------------------------------------------------------------------------------------------------------------------------------------------------------|----------|--------------------------|
| SLCO1B1 | 521 T > C    | Caucasians | Healthy | Pioglitazone | 32 | PK (AUC)              | No significant difference in the PK of pioglitazone between genotypes were found.                                                                              | 17635496 | Kalliokoski et al (2008) |
| IGF2BP2 | rs4402960G>T | Chinese    | T2D     | Pioglitazone | 86 | Response (PPG, HbA1c) | Carriers of the variant allele showed significantly lower reduction in PPG (-0.70 ± 3.92 mmol/l - -2.80 ± 3.81 mmol/l, P < 0.05) than homozygous GG carriers.  | 25247335 | Zhang et al (2014)       |
| IGF2BP2 | rs1470579A>C | Chinese    | T2D     | Pioglitazone | 86 | Response (PPG, HbA1c) | Carriers of the variant allele showed significantly lower reduction in PPG (-1.07 ± 4.04 mmol/L Vs -2.65 ± 3.85 mmol/L, P < 0.05) than homozygous AA carriers. | 25247335 | Zhang et al (2014)       |

AUC: area under the curve; CL/F: total clearance; Cmax: maximal plasma concentration; FPG: fasting plasma glucose; HbA1c: glycated haemoglobin; HOMA-IR: homeostasis model assessment of insulin resistance; PK: pharmacokinetics; PPG: post prandial glucose; T2D: type 2 diabetes; t1/2: elimination half-life.

**Supplementary Table 5:** Overview of studies focusing on interaction between genes and drugs acting in the incretin pathway in type 2 diabetes.

| Gene    | Variant                     | Population | Study group | Drug            | N   | Outcome                    | Major findings                                                                                                                                                               | PMID     | Author (publication year) |
|---------|-----------------------------|------------|-------------|-----------------|-----|----------------------------|------------------------------------------------------------------------------------------------------------------------------------------------------------------------------|----------|---------------------------|
| GLP1R   | rs3765467 C > T             | Chinese    | T2D         | Exenatide       | 36  | Response (Glucose)         | No significant association between the variant and response were found.                                                                                                      | 25785276 | Lin et al (2015)          |
| GLP1R   | rs3765467C>T                | Caucasians | Healthy     | Exogenous GLP-1 | 88  | Response (insulin)         | Carriers of the minor allele showed greater $\beta$ cell responsiveness than the wild type carriers (P < 0.05).                                                              | 20805279 | Sathananthan et al (2010) |
| GLP1R   | rs761386 C>T                | Chinese    | T2D         | Exenatide       | 36  | Response (Glucose)         | No significant association between the variant and response were found.                                                                                                      | 25785276 | Lin et al (2015)          |
| GLP1R   | rs6923761G>A                | Caucasians | Healthy     | Exogenous GLP-1 | 88  | Response (insulin)         | Carriers of one or more copies of the minor allele showed lower $\beta$ cell responsiveness than the wild type carriers (P < 0.05).                                          | 20805279 | Sathananthan et al (2010) |
| TCF7L2  | rs7903146C>T, rs12255372G>T | Caucasians | Healthy     | Exogenous GLP-1 | 73  | Response (insulin)         | Carriers of the risk alleles showed significantly greater reduction in GLP-1 induced insulin secretion (P < 0.02) compared to wild type carriers.                            | 17661009 | Schafer et al (2007)      |
| WFS1    | rs10010131 G>C              | Caucasians | Healthy     | Exogenous GLP-1 | 102 | Response (insulin)         | Compared with the wild type, carriers of the risk allele showed 36 and 26% lower GLP-1 induced first (P = 0.007) and second (P = 0.04) phase insulin secretion respectively. | 19330314 | Schafer et al (2009)      |
| TMEM14  | rs7202633 A>T               | Caucasians | healthy     | Exogenous GLP-1 | 232 | Response (insulin)         | Homozygous carriers of the risk allele had nearly two fold increased GLP-1 induced insulin secretion than the wild type (P = $2.0 \times 10^{-7}$ ).                         | 23674605 | 't Hart et al (2013)      |
| CHST3   | rs4148941 A>C               | Caucasians | healthy     | Exogenous GLP-1 | 232 | Response (insulin)         | Carriers of the C allele had 32% (P = $3.9 \times 10^{-8}$ ) lower GLP1 induced insulin secretion than the wild type carriers.                                               | 23674605 | 't Hart et al (2013)      |
| CTRB1/2 | rs7202877 T>G               | Caucasians | Healthy     | Exogenous GLP-1 | 232 | Response (insulin)         | Carriers of the G allele had 33% (P = $1.9 \times 10^{-6}$ ) greater GLP1 induced insulin secretion than the wild type carriers.                                             | 23674605 | 't Hart et al (2013)      |
| CTRB1/2 | rs7202877 T>G               | Caucasians | T2D         | DPP4I           | 354 | Response (HbA1c reduction) | G-allele carriers showed $0.51 \pm 0.16\%$ (P = 0.0015) smaller HbA1c reduction than the wild type carriers.                                                                 | 23674605 | 't Hart et al (2013)      |
| KCNQ1   | rs151290C>A, rs2237892C>T,  | Caucasians | High risk   | Exogenous GLP-1 | 102 | Response (insulin)         | No significant association between either of the variants and GLP-1 induced insulin secretion were found.                                                                    | 19366866 | Mussig et al (2009)       |

|            |                                       |            |         |                    |     |                    |                                                                                                                                                                    |          |                          |
|------------|---------------------------------------|------------|---------|--------------------|-----|--------------------|--------------------------------------------------------------------------------------------------------------------------------------------------------------------|----------|--------------------------|
|            | rs2237895A><br>C,<br>rs2237897C><br>T |            |         |                    |     |                    |                                                                                                                                                                    |          |                          |
| THADA      | rs7578597C><br>T                      | Caucasians | Healthy | Exogenous<br>GLP-1 | 123 | Response (insulin) | Homozygous carriers of the risk allele showed significantly reduced GLP-1 induced insulin secretion than CC and CT genotype carriers ( $P = 1.6 \times 10^{-3}$ ). | 19833888 | Simonis-Bik et al (2010) |
| MTNR1<br>B | rs10830963C<br>>G                     | Caucasians | Healthy | Exogenous<br>GLP-1 | 123 | Response (insulin) | Carriers of the risk allele showed 30% more GLP1 stimulated insulin secretion ( $P = 0.037$ ) compared with the wild allele carriers.                              | 19833888 | Simonis-Bik et al (2010) |

DPP4I: dipeptidyl peptidase 4 inhibitor; GLP-1: glucagon like peptide-1; T2D: type 2 diabetes; HbA1c: glycated haemoglobin.
